# Supplementary figures and images for: Potential protective mechanism of Tibetan kefir underlying gut-derived liver injury induced by ochratoxin A
Source: Royal Society of Chemistry journal article supplement (doi:10.1039/d2fo02360a), 2022-01-01

A

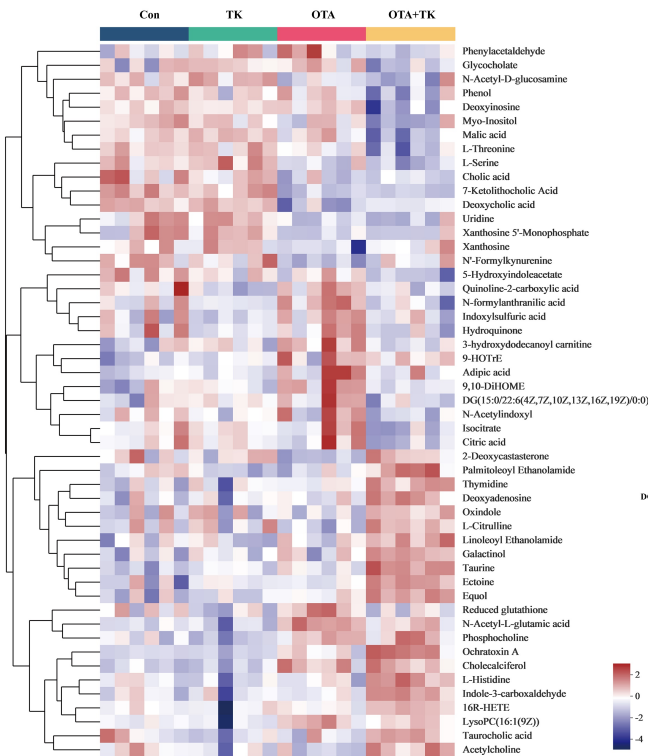

B

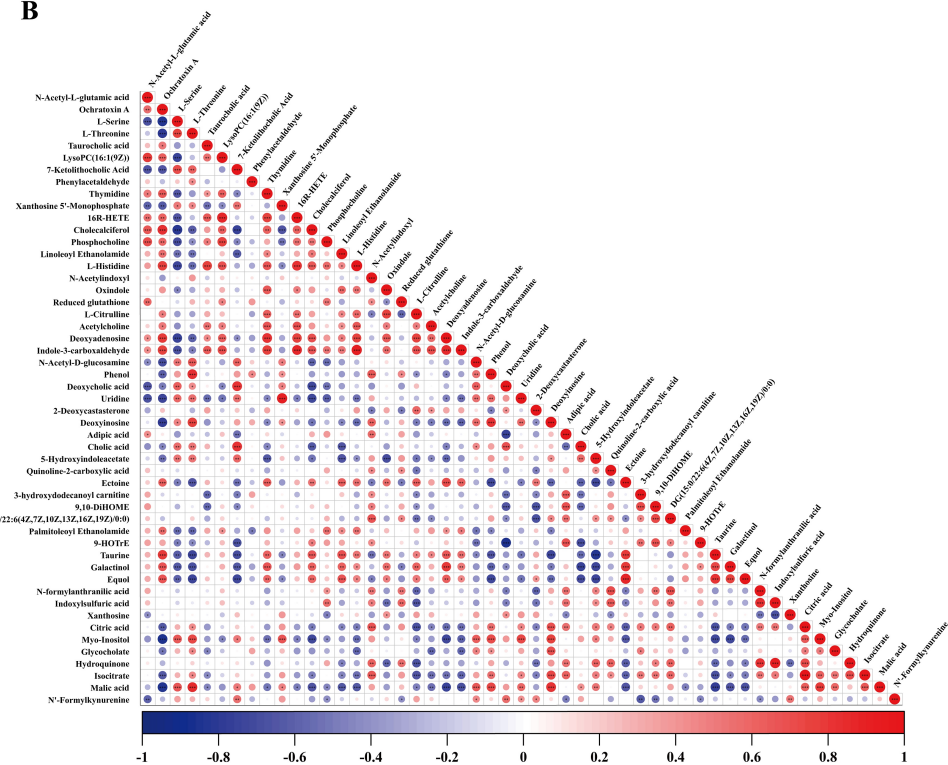

Supplement: d2fo02360a2.pdf [file d2fo02360a2.pdf]
